# Supplementary material for: Atomic layer deposition of SnO2 using hydrogen peroxide improves the efficiency and stability of perovskite solar cells
Source: Royal Society of Chemistry journal article supplement (doi:10.1039/d2nr06884b), 2023-01-01
Supplement: d2nr06884b1.pdf [file d2nr06884b1.pdf]

*Supporting Information for*

**Atomic layer deposition of SnO<sub>2</sub> using hydrogen peroxide improves  
efficiency and stability of perovskite solar cell**

Sang-Uk Lee<sup>1</sup>, Hyoungmin Park<sup>2</sup>, Hyunjung Shin<sup>2,3</sup>, and Nam-Gyu Park<sup>1,3\*</sup>

<sup>1</sup>School of Chemical Engineering, Center for Antibonding Regulated Crystals, Sungkyunkwan University, Suwon 16419, Republic of Korea.

<sup>2</sup>Department of Energy Science, Sungkyunkwan University, Suwon 16419, Republic of Korea.

<sup>3</sup>SKKU Institute of Energy Science and Technology (SIEST), Sungkyunkwan University, Suwon 16419, Republic of Korea

**Figure S1-S6**

**Table S1-S4**

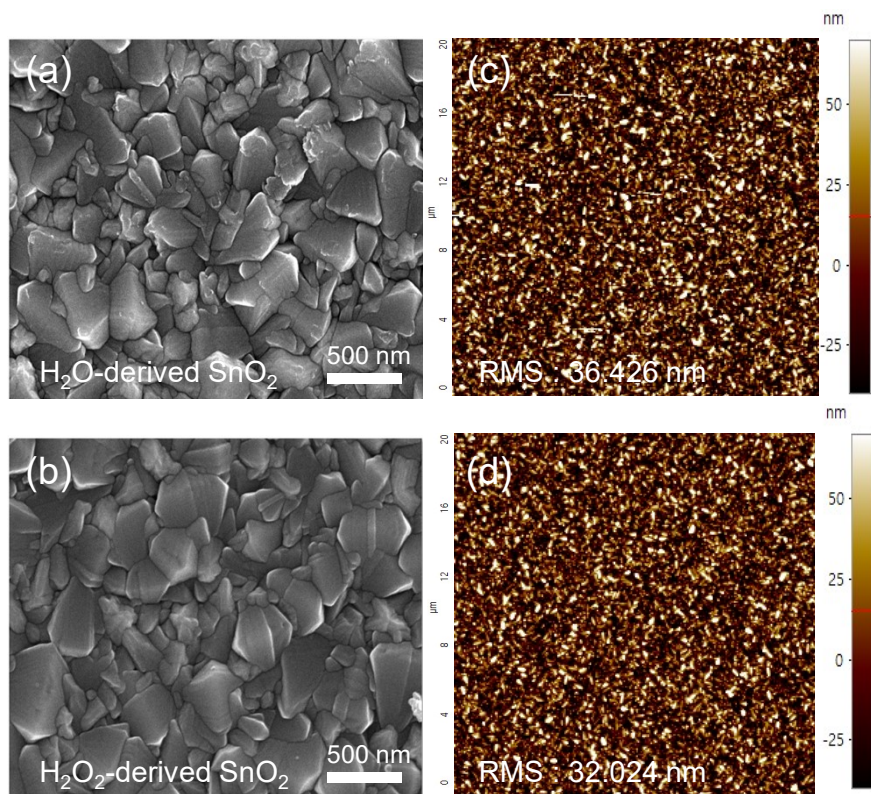

**Figure S1.** Top-view SEM images of (a) the H<sub>2</sub>O-derived SnO<sub>2</sub> and (b) the H<sub>2</sub>O<sub>2</sub>-derived SnO<sub>2</sub> on the FTO substrate. AFM images of (c) the H<sub>2</sub>O-derived SnO<sub>2</sub> and (d) the H<sub>2</sub>O<sub>2</sub>-derived SnO<sub>2</sub> on the FTO substrate. RMS is root mean square.

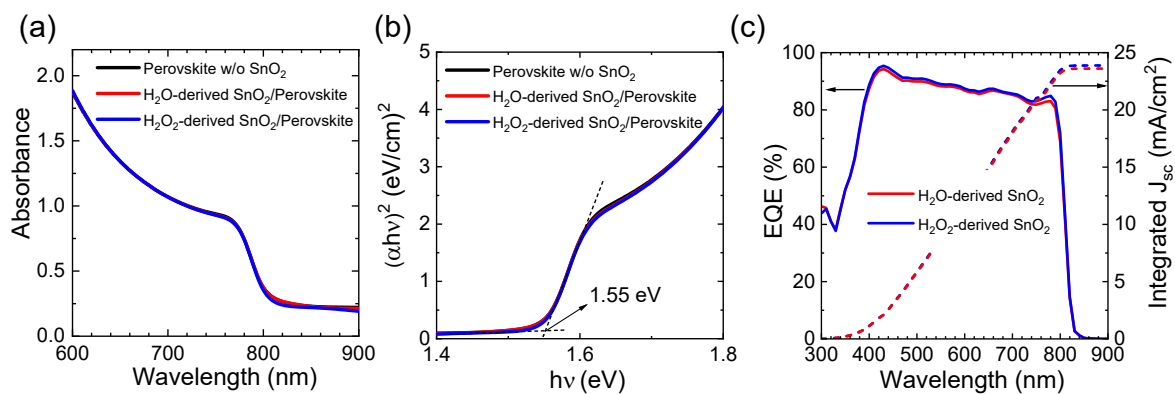

**Figure S2.** (a) Absorbance and (b) Tauc plot of the perovskite films without and with SnO<sub>2</sub> layer (H<sub>2</sub>O-derived and H<sub>2</sub>O<sub>2</sub>-derived SnO<sub>2</sub>). Films were deposited on a glass substrate. (c) External quantum efficiency (EQE) spectra and integrated J<sub>sc</sub> of PSCs based on the H<sub>2</sub>O-derived and H<sub>2</sub>O<sub>2</sub>-derived SnO<sub>2</sub>.

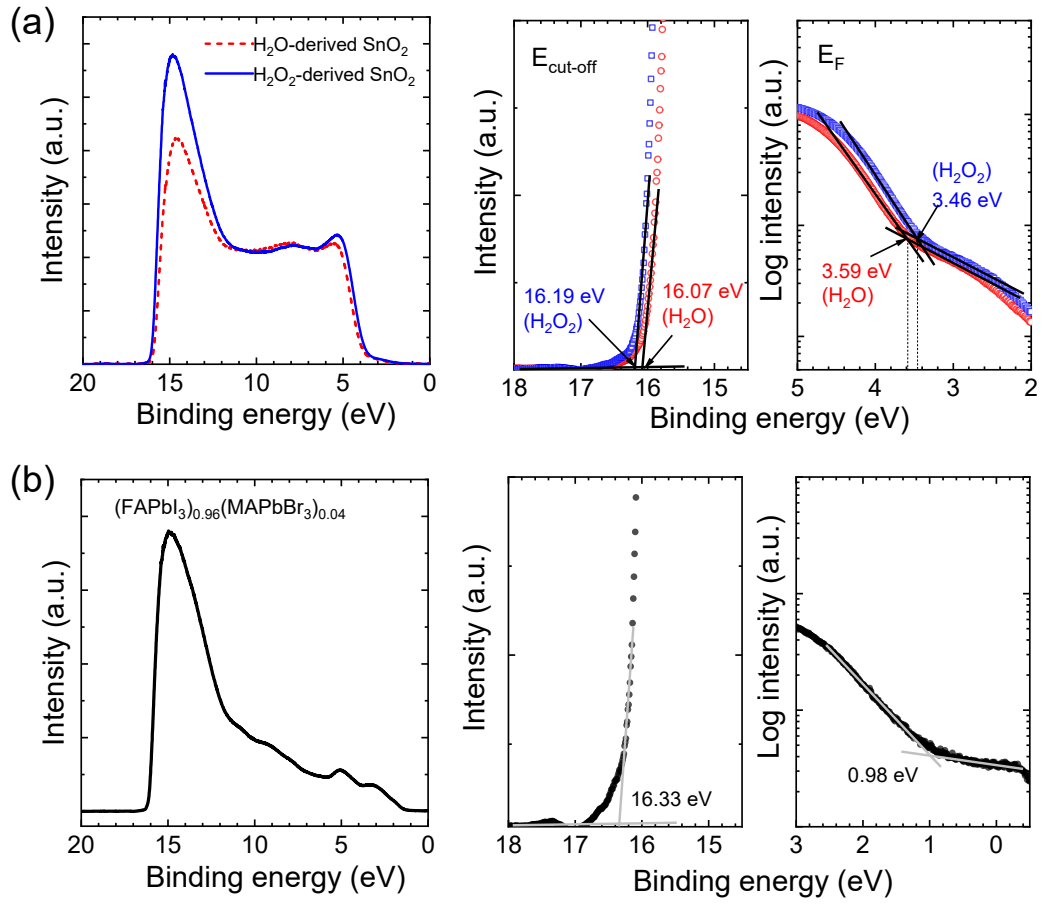

**Figure S3.** UPS spectra of (a) ALD-processed  $\text{SnO}_2$  depending on oxygen source of  $\text{H}_2\text{O}$  and  $\text{H}_2\text{O}_2$  and (b)  $(\text{FAPbI}_3)_{0.96}(\text{MAPbBr}_3)_{0.04}$  perovskite, showing the full range (left panel), the cut-off energy (middle panel) and Fermi edge (middle panel).

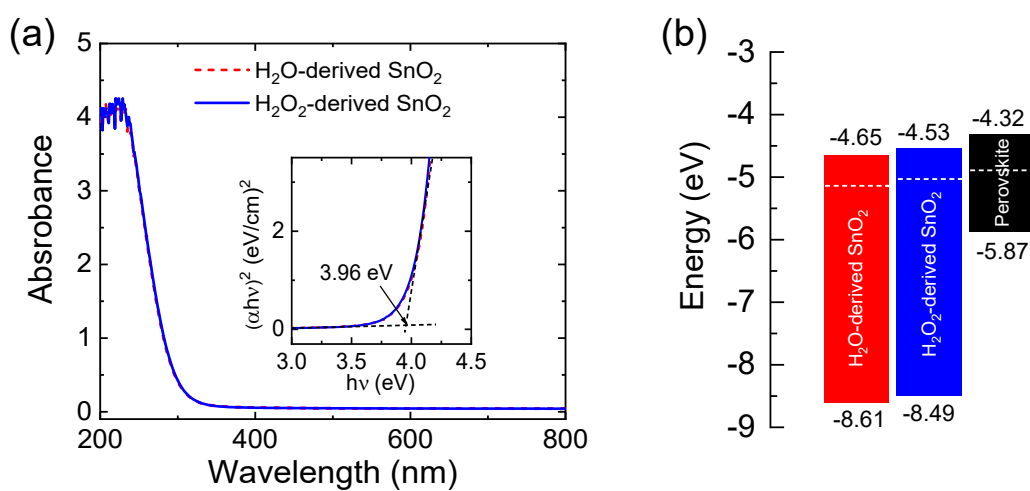

**Figure S4.** (a) UV-Vis spectra of the ALD-processed SnO<sub>2</sub> films deposited on a glass substrate. Inset shows Tauc plot. (b) Energy level diagram of the H<sub>2</sub>O-derived SnO<sub>2</sub>, H<sub>2</sub>O<sub>2</sub>-derived SnO<sub>2</sub>, and perovskite layer based on the data obtained from UPS and UV-Vis spectroscopy.

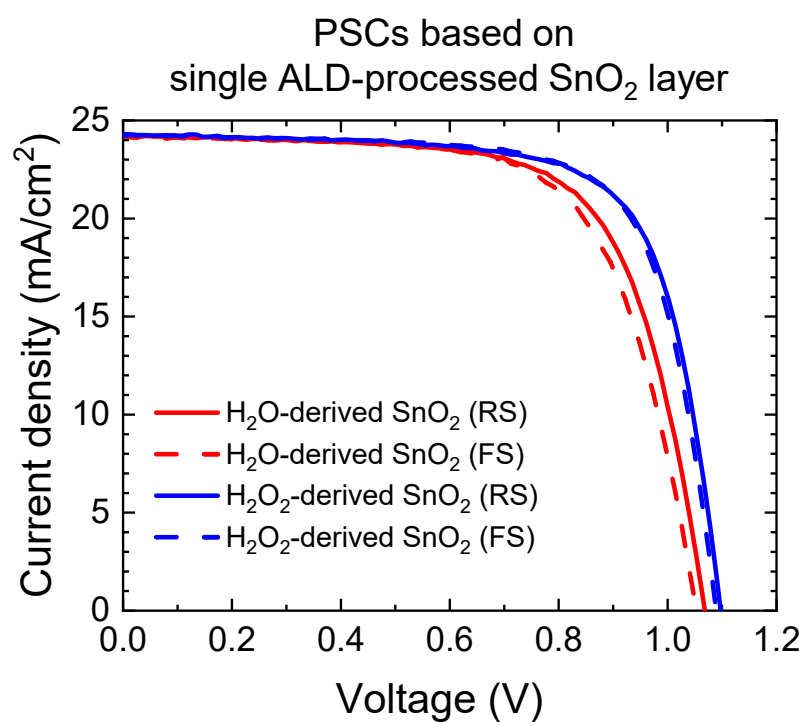

**Figure S5.** J-V curves of PSCs based on a single ALD-processed SnO<sub>2</sub> layer depending on oxygen source of H<sub>2</sub>O and H<sub>2</sub>O<sub>2</sub>. FS (dashed lines) and RS (solid lines) represent the forward and reverse scanned data, respectively.

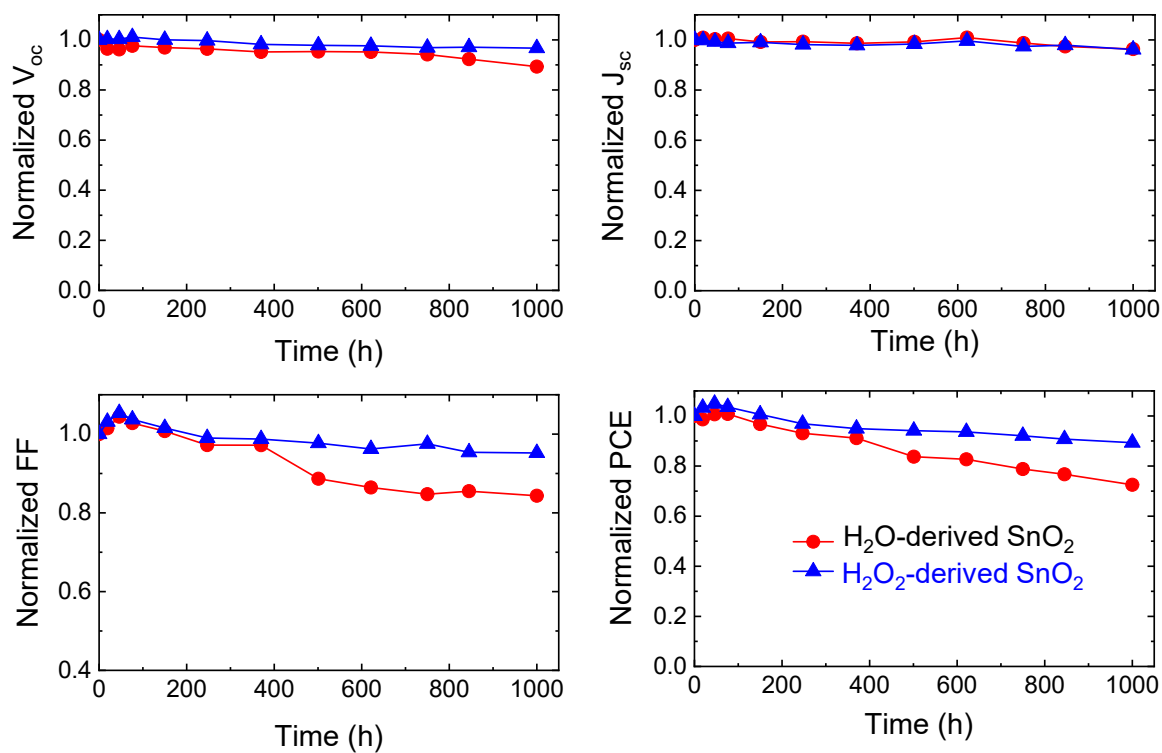

**Figure S6.** Storage stability showing normalized photovoltaic parameters of  $V_{oc}$ ,  $J_{sc}$ , FF and PCE of PSCs based on the H<sub>2</sub>O- and H<sub>2</sub>O<sub>2</sub>-derived SnO<sub>2</sub>, measured for 1000 h under relative humidity of 30±10% at room temperature.

**Table S1.** Binding energies and arial ratio of O<sub>OH</sub> peak to total peak in O 1s XPS spectra for the H<sub>2</sub>O- and H<sub>2</sub>O<sub>2</sub>-derived SnO<sub>2</sub>.

| Sample                                                  | O 1s binding energy (eV) |                 | Arial ratio of O <sub>OH</sub> (%) |
|---------------------------------------------------------|--------------------------|-----------------|------------------------------------|
|                                                         | O <sub>Sn</sub>          | O <sub>OH</sub> | O <sub>OH</sub> / O 1s             |
| H <sub>2</sub> O-derived SnO <sub>2</sub>               | 530.68                   | 532.08          | 25.47                              |
| H <sub>2</sub> O <sub>2</sub> -derived SnO <sub>2</sub> | 530.88                   | 532.33          | 21.36                              |

**Table S2.** Parameters for TRPL fitting using a biexponential decay equation with  $I(t) = I_0 + A_1 \exp(-(t - t_0)/\tau_1) + A_2 \exp(-(t - t_0)/\tau_2)$ . Average lifetime ( $\tau_{avg}$ ) was calculated by  $\tau_{avg} = (A_1\tau_1^2 + A_2\tau_2^2) / (A_1\tau_1 + A_2\tau_2)$ . Fitting reliability was confirmed by R<sup>2</sup>.

|                                                                           | A <sub>1</sub><br>(%) | $\tau_1$ (ns) | A <sub>2</sub><br>(%) | $\tau_2$ (ns) | $\tau_{avg}$<br>(ns) | R <sup>2</sup> |
|---------------------------------------------------------------------------|-----------------------|---------------|-----------------------|---------------|----------------------|----------------|
| Glass/Perovskite                                                          | 1702.34<br>(71.01%)   | 104.45        | 695.08<br>(28.99%)    | 1957.3        | 1743.1               | 0.984          |
| Glass/H <sub>2</sub> O-derived SnO <sub>2</sub> /perovskite               | 301.81<br>(30.12%)    | 71.30         | 700.25<br>(69.88%)    | 486.69        | 462.02               | 0.995          |
| Glass/H <sub>2</sub> O <sub>2</sub> -derived SnO <sub>2</sub> /perovskite | 266.78<br>(27.56%)    | 46.74         | 701.22<br>(72.44%)    | 390.27        | 375.30               | 0.996          |

**Table S3.** Photovoltaic parameters of short-circuit current density (J<sub>sc</sub>), open-circuit voltage (V<sub>oc</sub>), fill factor (FF), and power conversion efficiency (PCE) of PSCs with the structure of FTO/ALD-SnO<sub>2</sub>/(FAPbI<sub>3</sub>)<sub>0.96</sub>(MAPbBr<sub>3</sub>)<sub>0.04</sub>/Spiro-MeOTAD/Au.

| ALD sample                                              | Scan direction | J <sub>sc</sub><br>(mA/cm <sup>2</sup> ) | V <sub>oc</sub> (V) | FF (%) | PCE (%) |
|---------------------------------------------------------|----------------|------------------------------------------|---------------------|--------|---------|
| H <sub>2</sub> O-derived SnO <sub>2</sub>               | Reverse        | 24.198                                   | 1.0685              | 0.6849 | 17.71   |
|                                                         | Forward        | 24.179                                   | 1.0531              | 0.6738 | 17.16   |
| H <sub>2</sub> O <sub>2</sub> -derived SnO <sub>2</sub> | Reverse        | 24.299                                   | 1.0973              | 0.7159 | 19.09   |
|                                                         | Forward        | 24.246                                   | 1.0891              | 0.7234 | 19.10   |

**Table S4.** Photovoltaic parameters of best-performing PSCs with the structure of FTO/bilayer (ALD-SnO<sub>2</sub>/colloidal SnO<sub>2</sub>)/(FAPbI<sub>3</sub>)<sub>0.96</sub>(MAPbBr<sub>3</sub>)<sub>0.04</sub>/Spiro-MeOTAD/Au.

| Bilayer SnO <sub>2</sub> sample                                                      | Scan direction | J <sub>sc</sub> (mA/cm <sup>2</sup> ) | V <sub>oc</sub> (V) | FF     | PCE (%) |
|--------------------------------------------------------------------------------------|----------------|---------------------------------------|---------------------|--------|---------|
| H <sub>2</sub> O-derived SnO <sub>2</sub> / colloidal SnO <sub>2</sub>               | Reverse        | 24.073                                | 1.1175              | 0.7961 | 21.42   |
|                                                                                      | Forward        | 23.850                                | 1.1140              | 0.7720 | 20.51   |
| H <sub>2</sub> O <sub>2</sub> -derived SnO <sub>2</sub> / colloidal SnO <sub>2</sub> | Reverse        | 24.112                                | 1.1460              | 0.8085 | 22.34   |
|                                                                                      | Forward        | 24.059                                | 1.1348              | 0.8003 | 21.85   |

**Table S5.** Statistical photovoltaic parameters of PSCs employing a bilayer SnO<sub>2</sub> based on H<sub>2</sub>O- and H<sub>2</sub>O<sub>2</sub>-derived SnO<sub>2</sub> as ETLs.

| Bilayer SnO <sub>2</sub> sample                                                      | Scan direction | J <sub>sc</sub> (mA/cm <sup>2</sup> ) | V <sub>oc</sub> (V) | FF               | PCE (%)         |
|--------------------------------------------------------------------------------------|----------------|---------------------------------------|---------------------|------------------|-----------------|
| H <sub>2</sub> O-derived SnO <sub>2</sub> / colloidal SnO <sub>2</sub>               | Reverse        | 23.969<br>±0.126                      | 1.1200<br>±0.010    | 0.7688<br>±0.016 | 20.64<br>±0.384 |
|                                                                                      | Forward        | 24.068<br>±0.090                      | 1.0979<br>±0.022    | 0.7673<br>±0.014 | 20.28<br>±0.545 |
| H <sub>2</sub> O <sub>2</sub> -derived SnO <sub>2</sub> / colloidal SnO <sub>2</sub> | Reverse        | 24.077<br>±0.061                      | 1.1352<br>±0.013    | 0.7949<br>±0.012 | 21.73<br>±0.439 |
|                                                                                      | Forward        | 24.095<br>±0.090                      | 1.1287<br>±0.010    | 0.7837<br>±0.012 | 21.31<br>±0.244 |
